# Supplementary material for: Generation of a MyoD knock-in reporter mouse line to study muscle stem cell dynamics and heterogeneity
Source: PubMed Central journal article supplement (PMC10214404; doi:10.1016/j.isci.2023.106592), 2023-04-08
Supplement: mmc1.pdf [file mmc1.pdf]

**Supplemental information**

**Generation of a MyoD knock-in reporter mouse  
line to study muscle stem cell  
dynamics and heterogeneity**

**Ryo Fujita, Seiya Mizuno, Taketaro Sadahiro, Takuto Hayashi, Takehito Sugawara, Fumihiro Sugiyama, Yusuke Ono, Satoru Takahashi, and Masaki Ieda**

## Supplementary Data

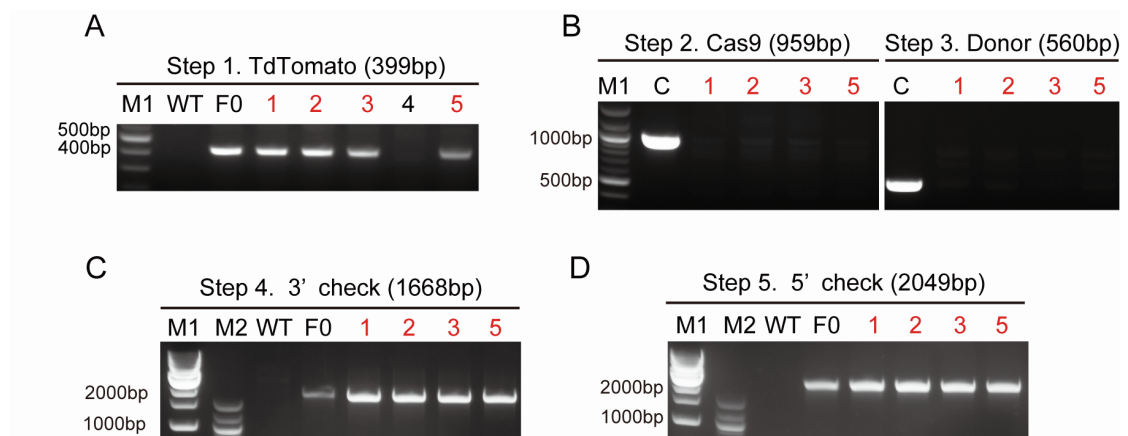

**Figure S1. PCR analysis of F1 MyoD knock-in (KI) mice, related to Figure 1.**

(A-D) Genomic DNA analysis of F1 MyoD<sup>KI/+</sup> and WT mouse tails using PCR. The primer sets used for steps 1, 4, and 5 as shown in Fig. 1B. Five F1 mice (1–5) and their parents (female WT and male F0 #10) were subjected to PCR analysis. The expected size of each PCR amplicon is indicated in parentheses. M1, 1 kb DNA ladder; M2, 100 bp DNA ladder; C, Cas9-amp control.

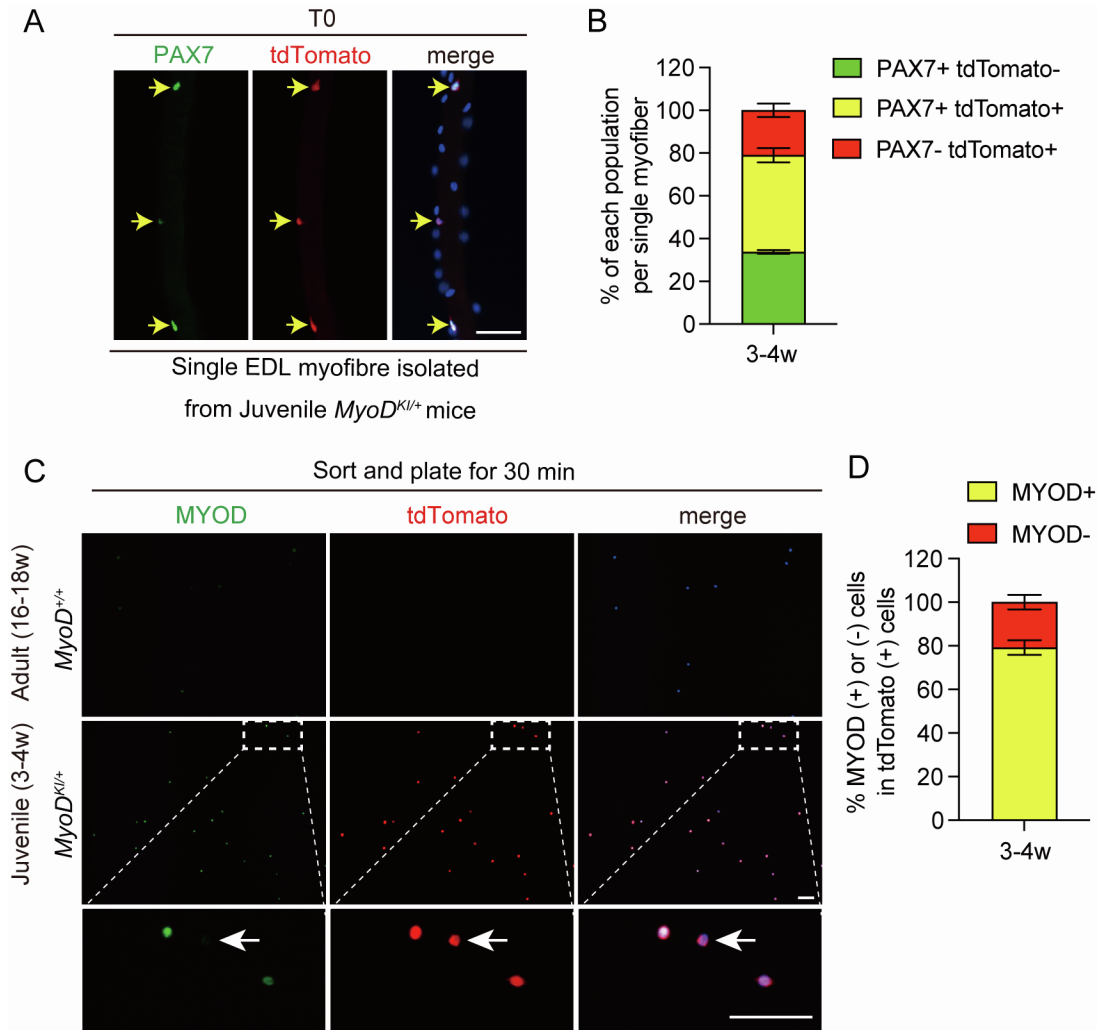

**Figure S2. Analysis of MyoD-tdTomato fluorescence in muscle stem cells (MuSCs) from juvenile *MyoD*<sup>KI/+</sup> mice *in vivo*, related to Figure 2.**

(A) Immunofluorescence of PAX7 (green) and tdTomato (red) on freshly isolated EDL myofibers (T0) from 3–4-week-old *MyoD*<sup>KI/+</sup> mice. Nuclei stained with DAPI. Yellow arrows indicate PAX7 (+) and tdTomato (+) cells on EDL myofibers. Scale bar: 50  $\mu$ m. (B) The proportion of PAX7 (+), tdTomato (-) (green), PAX7 (+), tdTomato (+) (yellow), and PAX7 (-), tdTomato (+) (red) cells in A. (C) tdTomato (+) cells sorted from 3–4-week-old *MyoD*<sup>KI/+</sup> mice using flow cytometer, and these cells are re-plated for 30 min to perform immunofluorescence analysis with antibodies against MYOD (green) and tdTomato (red). MuSCs from 16–18-week-old *MyoD*<sup>+/+</sup> mice was used as a negative control for MYOD and tdTomato staining. The area in white dotted boxes is shown at higher magnification. White arrows indicate MYOD (-), tdTomato (+) cells. Scale bar: 50  $\mu$ m. (D) The proportion of MYOD (+) or MYOD (-) cells in sorted tdTomato (+) cells in C (n = 4 mice). All data are represented as the mean  $\pm$  standard error of the mean (s.e.m.).

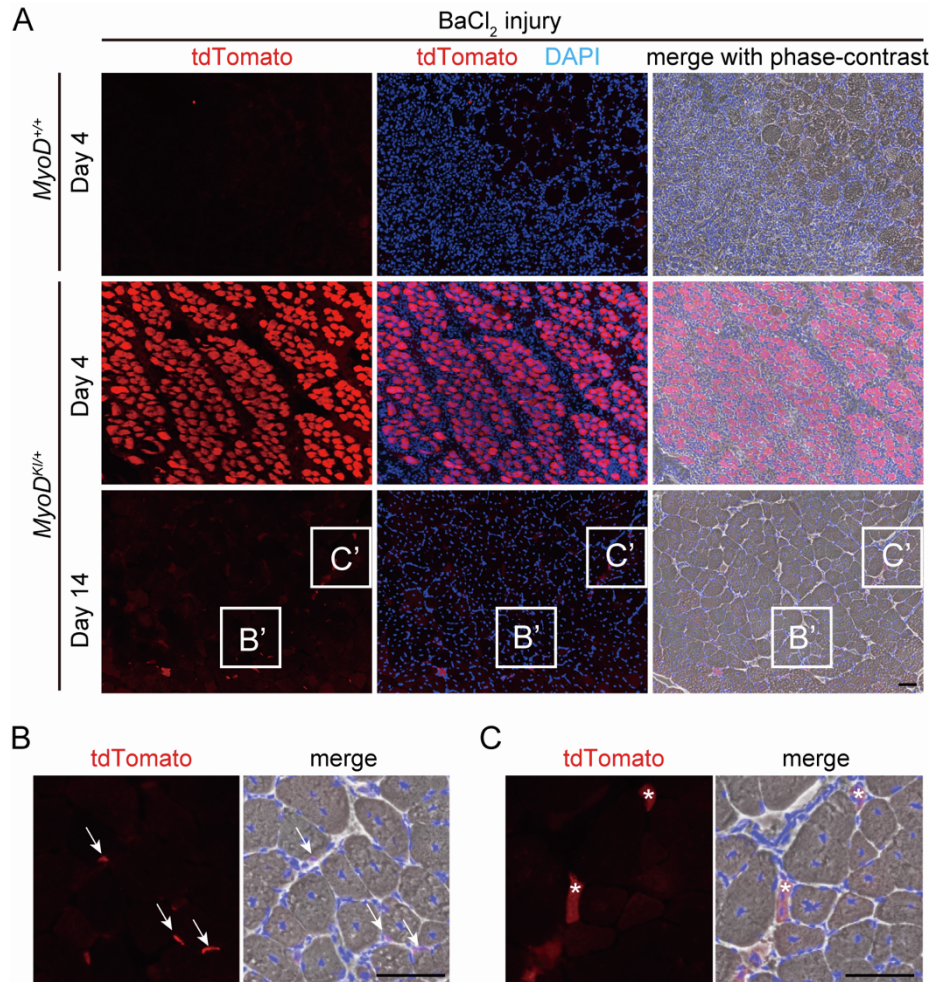

**Figure S3. Analysis of MyoD-tdTomato fluorescence in damaged and regenerated myofibers following BaCl<sub>2</sub> injury, related to Figure 2 and 3.**

(A-C) TA muscle cross-sections from *MyoD*<sup>+/+</sup> or *MyoD*<sup>KI/+</sup> mice at 4- or 14-day post BaCl<sub>2</sub> injury. Nuclei stained with DAPI. The regions depicted in B' and C' are shown at higher magnification in (B) and (C), respectively. White arrows in (B) indicate tdTomato<sup>+</sup> cells associated with the regenerated myofibers at day 14 post injury. White asterisks in (C) show tdTomato<sup>+</sup> myofibers at day 14 post injury. Scale bars: 50 μm.

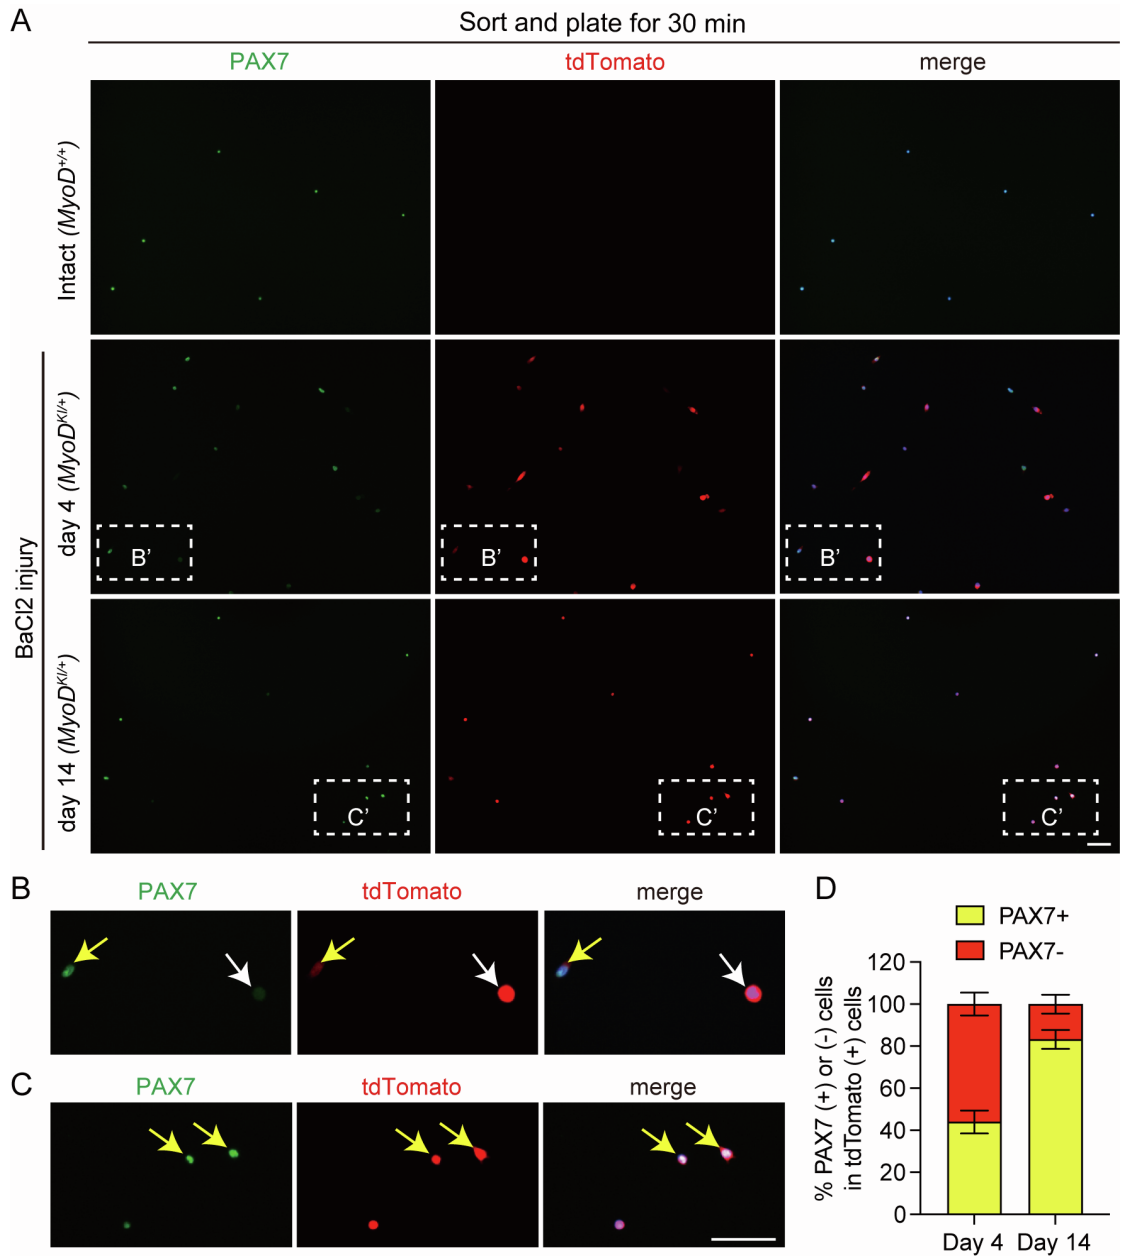

**Figure S4. Analysis of MyoD-tdTomato fluorescence and PAX7 expression in the MuSCs isolated from damaged and regenerated muscles following BaCl<sub>2</sub> injury, related to Figure 2.**

(A-C) tdTomato (+) cells isolated from *MyoD<sup>KI/+</sup>* mice at 4- and 14-days post BaCl<sub>2</sub> injury using flow cytometer, and these cells are re-plated for 30 min to perform immunofluorescence analysis with antibodies against PAX7 (green) and tdTomato (red). The regions depicted in B' and C' are shown at a higher magnification in (B) and (C), respectively. Yellow arrows indicate PAX7 (+), tdTomato (+) cells. White arrows indicate PAX7 (-) tdTomato+ cells. Scale bars: 50  $\mu$ m. (D) The proportion of PAX7 (+) or PAX7 (-) cells in sorted tdTomato (+) cells in A (n = 4 mice). All data are represented as the mean  $\pm$  s.e.m.

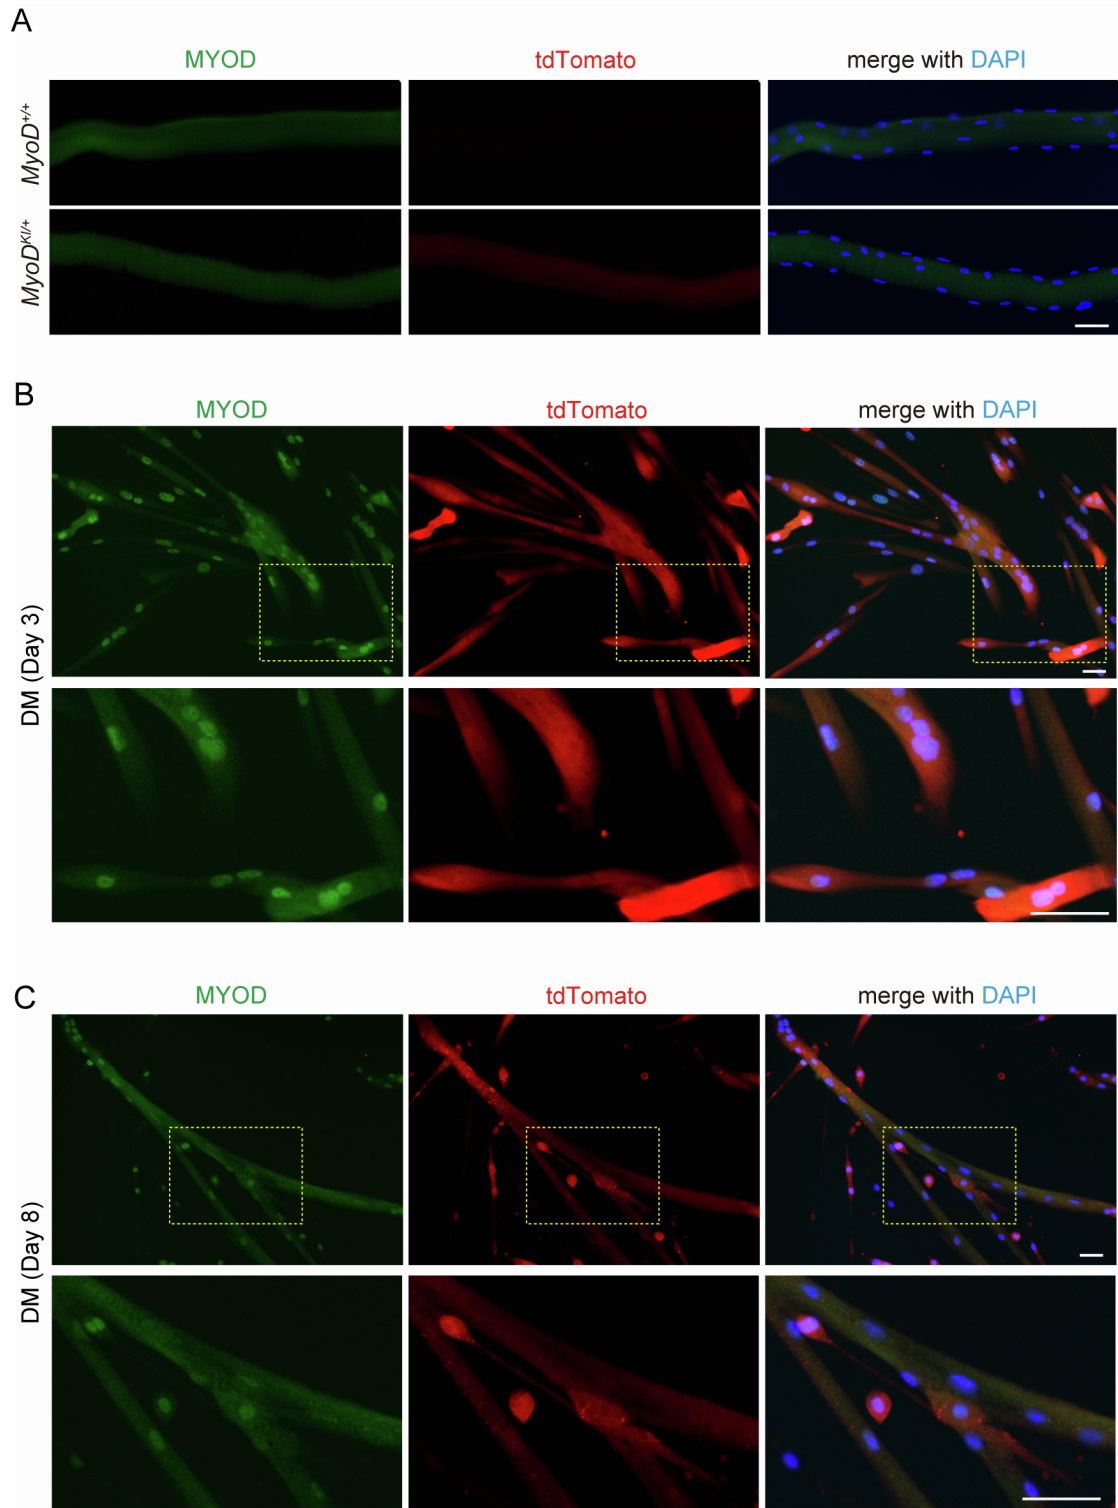

**Figure S5. Analysis of MyoD-tdTomato fluorescence in differentiating myotubes *in vitro*, related to Figure 2 and 3.**

(A-B) Immunofluorescence of MYOD (green) and tdTomato (red) on primary myotubes from *MyoD*<sup>KI/+</sup> mice. Nuclei stained with DAPI. MuSCs from *MyoD*<sup>KI/+</sup> mice were cultured in grown medium for 4 days, media was replaced with differentiation media and the cells were cultured for (A) 3 days (B) or 8 days. Scale bars: 50  $\mu$ m.

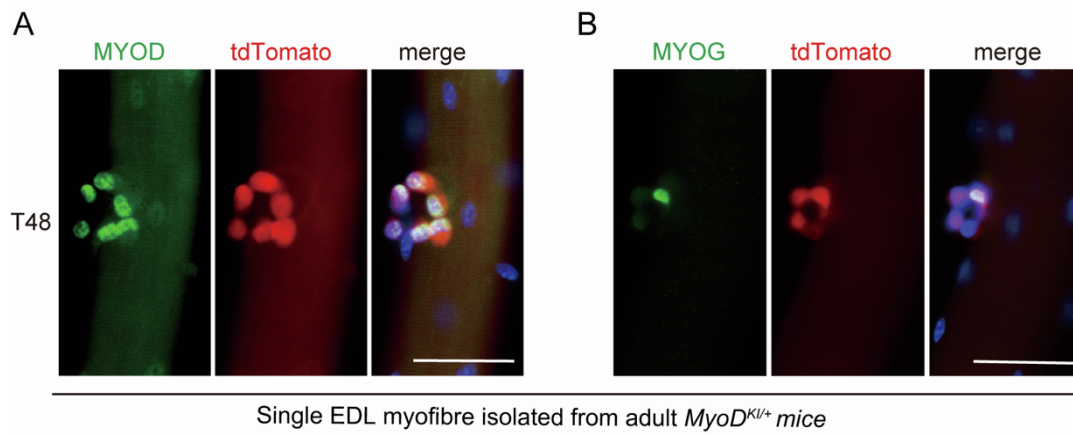

**Figure S6. Immunofluorescence analysis of MyoD-tdTomato with MYOD or MYOGENIN antibodies on single EDL myofibers after 48 h culture, related to Figure 3.**

**(A-B)** Immunofluorescence of MYOD **(A)** or MYOGENIN **(B)** and tdTomato on single EDL myofibers cultured for 48 h (T48) from 15–16-week-old *MyoD<sup>KI/+</sup>* mice. Nuclei stained with DAPI. Scale bar: 50  $\mu$ m.

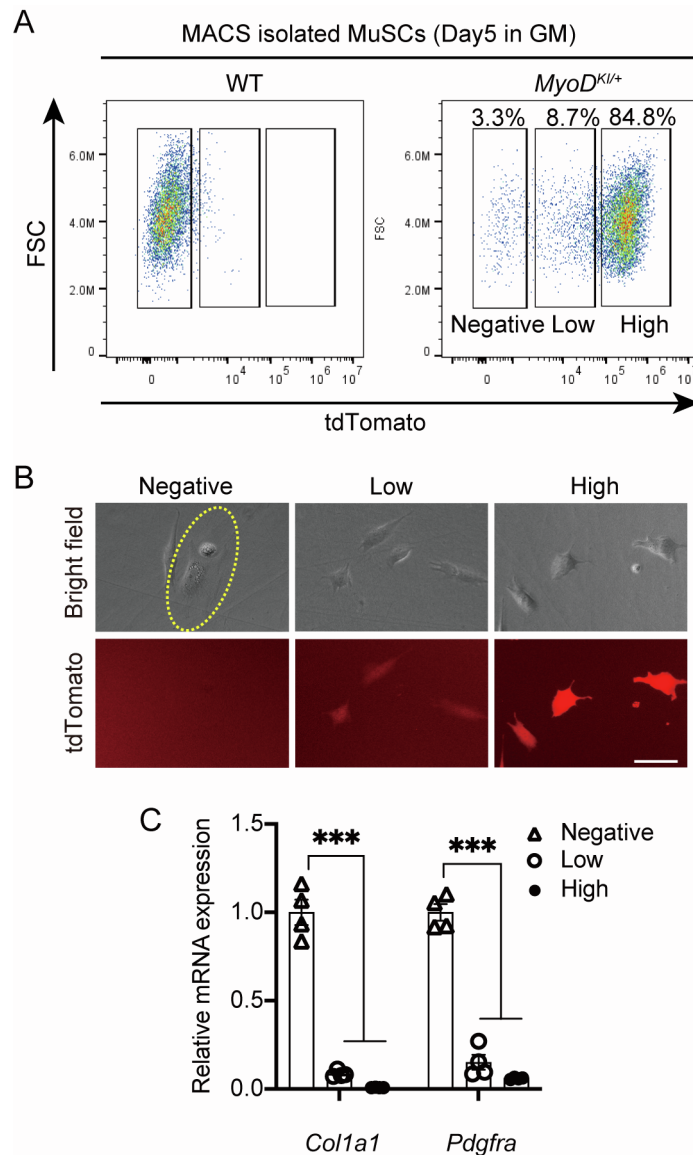

**Figure S7. MyoD-tdTomato fluorescence was restricted to the myogenic progenitors, related to Figure 3, 5, and 6.**

(A) Representative flow cytometry plot of cultured MuSCs isolated from *MyoD*<sup>+/+</sup> (WT) and *MyoD*<sup>KI/+</sup> mice. The negative gate was defined based on WT MuSC analysis. (B) Cultured MACS-isolated MuSCs from *MyoD*<sup>KI/+</sup> mice were gated into MyoD-tdTomato<sup>negative</sup>, MyoD-tdTomato<sup>low</sup>, and MyoD-tdTomato<sup>high</sup> groups and sorted using flow cytometry. These cells were re-plated for 4 h to allow attachment to the dishes. The MyoD-tdTomato<sup>negative</sup> population contains fibroblastic cells with a large cytosol, as indicated by the yellow circle. (C) Relative expression of *Coll1a1* and *Pdgfra*, markers for fibroblasts, determined by RT-qPCR, in MyoD-tdTomato<sup>negative</sup>, MyoD-tdTomato<sup>low</sup> and MyoD-tdTomato<sup>high</sup> sorted using flow cytometry (n = 4 mice). All data are represented as the mean ± s.e.m. \*\*\**P* < 0.001.



Figure S8. Full Sequence of 3'-MyoD-tdTomato PCR product amplified in Step 4, related to Figure 1.

*tdTomato* **STOP codon** *MyoD exon3*

GAGCGCGTGATGAACTTCGAGGACGGCGGTCTGGTGACCGTGACCCAGGACTCCTCCCTGCAGGACGGCACGCTGATCTAC  
AAGGTGAAGATGCGCGGCACCAACTTCCCCCGACGGCCCGTAATGCAGAAGAAGACCATGGGCTGGGAGGCCTCCAC  
CGAGCGCTGTACCCCGCGACGGCGTCTGAAGGGCGAGATCCACCAGGCCCTGAAGCTGAAGGACGGCGGCCACTACC  
TGGTGGAGTTC AAGACCATCTACATGGCCAAGAAGCCCGTGCAACTGCCCGGCTACTACTACGTGGACACCAAGCTGGACA  
TCACCTCCACAACGAGGACTACACCATCGTGAAGCAGTACGAGCGCTCCGAGGGCCGCCACCACCTGTTCTGTACGGCAT  
GGACGAGCTGTACAAGTAA GAATTC **TGA** GAGATCGACTGCAGCAGCAGAGGGCGCACCACCGTAGGCACTCTGGGGATG  
GTGTCCCTGGTTCTTACGCCAAAAGATGAAGCTTAAATGACACTCTTCCCACTGTCCTTTCGAAGCCGTTCTTCCAGAGG  
GAAGGGAAGAGCAGAAGTCTGTCTAGATCCAGCCCAAAGAAAGGACATAGTCCTTTTTGTTGTTGTTGTAGTCCTTC  
AGTTGTTTGTGTTTTCATGCGGCTCACAGCGAAGGCCACTTGCCTCTGGCTGCACCTACTGGCCAGAGCTGATCCT  
TGAGTGGCCAGGCGCTTCTTCTCATAGCACAGGGGTGAGCCTTGACACCTAAGCCCTGCCCTCCACATCCTTTTGT  
TGTCACCTTCTGGAGCCCTCTGGCACCCACTTTTCCACAGCTTGCAGGAGCCACTCAGGTCTCAGGTGTAACAGGTGTAA  
CCATACCCACTCTCCCCCTCCGCGGTT CAGGACCACTATTTTTTATATAAGACTTTTGTAACTATTCTGTGTAATAAGA  
GTTGCTTGCCAGAGCGGGAGCCCTTGGGCTATATTTATCTCCAGGCATGCTGTGTAGTGCAACAAAACTTTGTATGTT  
TATTCCTCAAGCGGGGAGCCTCGAGGCTCGCTCGCTCAGGTGTTGAAATAAAGACGCTAATTTATACAAAGTGGCTCTG  
GCTTTTCTAAGGGGATCAGAAAGAACTCTACGAACTGGGCGGGCTGTCTCGCAGCGACCCCTGTAGGTGGCAGAAGGG  
TAGCACGGAGGCTGGGTAGTGCTGGGTAATGAAGAAGGGCTGGCAGACCTCCAGCTGTAGGGAATTCCCAGGCCTTGCC  
TGCCGCACCCAAGAAAACAGTGGCTCCGGTGGAAAGATGCACGTAGGTTGATGTTTCGTTTAAAAATACAAAAAGCCAGAT  
GTGGCGGCTCATCCCTGTAATCTCAACATATTTGAGAAGCCGAGGCAGGAGGATGGAGGCAAGCTGGAGGCCACCCTGGC  
GATAAAGACATAACCTCTTTAAAATACAAAATTTAAAAGTTGGTGTAAAGGAGGTGCTCAGGTGATAGAGCACTTGCCTAGC  
ATGCACAAAATCCCAGGCTCAGTCCCAGCACCATATCAACCTGTCATGGGGGACACAGCTGTAGTTTCAAGGCCCGGAAG  
GNNNNNCCAAGGAAAAAA

Figure S9. Full sequence of 5'-MyoD-tdTomato PCR product amplified in Step 5, related to Figure 1.

*MyoD* exon1-3 P2A *tdTomato*

TCCTGCGCAACGCCATCCGCTACATCGAAGGTCTGCAGGCTCTGCTGCGCGACCAGGACCCGCGCCCCCTGGCGCCGCTG  
CCTTCTACGCACCTGGACCGCTGCCCCAGGCCGTGGCAGCGAGCACTACAGTGGCGACTCAGATGCATCCAGCCCGCT  
CCAACTGCTCTGATGGCATGGTAAGGCGGGGGGCTCAGGAGGATGAGCAATGGAGGCGCGCCTGGGGTATCTGCAACA  
GGTTTCCGAGGCCCTGGGGTGGGGGTGCCCTTATACCTAGATGCTCCTGGCATCTGACACTGGAGTCGCTTTGGAGACCC  
AGGGCATCTATGATTCTGCCGATTGGGGGTGGAACACTGCTGCGCAGACCCCGGGATATGCTTTTCTTCTCATTATTACCT  
AATGCAGATTATTGTTCTGAGTACTGTCCACTCTCAGTTTGGCCCCGCATGCGACAGCTTCCAGTGTGTGGCTGGCTCCTA  
CCACCTGGGGCTGACCCAGTCTGGAACCAGCAGCTGAGACTAAGGGAGTGAGGGAGGGGTGATGACAAGGAGTGTTC  
TTGAGACCCACTCGGGCCCTGTAGACCTAACTCTGTTATCCTTGCTATTGCGCAGATGGATTACAGCGGCCCCCAAGCGGCC  
CCGGCGGCAGAATGGCTACGACACCCGCTACTACAGTGAGGCGCGCGCGGTGCGTATTCTCAGCTGTTCCAGCTAGCAG  
GCCTTTATCGGCCCTTGTATCCCCCTTGAACCTTCTCTCGCTCCCTAGGCTTAGTATCCTCTTCTGCCTCCACCACATACATA  
CCCCTACCTTGGGATGGCGGGGGGGGGAGGCTGGGGGGGAGCATTGGGGGAGGGGACAAAGAAGTATGATGCAC  
ACCTTCTCTCTTCTCTTCCAGTCTAGCAAGTCTCAGTTTCCCTTTTGTACAAAGTCCCGTGCCTATGGGCAGGAGACTT  
GAGAAGGGCCGAAGTTTGATTACTAACCTTCCACTCCCTCACAGAGTCCAGGCCAGGGAAGAGTGCGGCTGTGTGAG  
CCTGACTGCCTGTCCAGCATAGTGAGCGCATCTCCACAGACAGCCCCGCTGCGCCTGCGCTGCTTTTGGCAGATGCACCA  
CCAGAGTCGCCTCCGGGTCCGCCAGAGGGGGCATCCCTAAGCGACACAGAACAGGGAACCCAGACCCCGTCTCCCGACGC  
CGCCCCCTCAGTGTCTGCAGGCTCAAATCCTAACGCGATTTATCAGGTGCTTAAGCTTGAAGCGGAGGCCACCAACTTCTCCC  
TGCTGAAGCAGGCCGCGACGCTGGAGGAGAACCCCGGCCCATGGTGAGCAAGGGCGAGGAGGTATCAAAGAGTTCAT  
GCGCTTCAAGGTGCGCATGGAGGGCTCCATGAACGGCCACGAGTTCGAGATCGAGGGCGAGGGCGAGGGCCGCCCTAC  
GAGGGCACCCAGACCCCAAGCTGAAGGTGACCAAGGGCGGGCCCCCTGCCCTTCGCCTGGGACATCCTGTCCCCCAGTTC  
ATGTACGGCTCCAAGGCGTACGTGAAGCACCCCGCGACATCCCCGATTACAAGAAGCTGCCTTCCCCGAGGGCTCAAGT  
GGGAGCGCTGATGAACCTCGAGGACGGCGGTCTGGTGACCGTGACCCAGGACTCCTCCTGCAGGACGGCACGCTGATC  
TACAAGGTGAAGATGCGCGGCACCAACTTCCCCCGACGGCCCCGTAATGCAGAAGAAGACCATGGGCTGGGAGGCCTC  
CACCGAGCGCCTGTACCCCGCGACGGCGTGTGAAGGGCGAGATCCACCAGGCCCTGAAGCTGAAGGACGGCGGCCACT  
ACCTGGTGGAGTTCAAGACCATCTACATGGCCAAGAAGCCCGTGAACCTGCCCGGCTACT

**Table S3. List of primer sequences used in this study, related to STAR Methods.**

| <b>MyoD-KI screening</b>              | <b>Orientation</b> | <b>Sequence (5' to 3')</b>   |
|---------------------------------------|--------------------|------------------------------|
| <i>tdTomato (Step 1)</i>              | Fw                 | CAGTTCATGTACGGCTCCAA         |
|                                       | Rv                 | GAGGTGATGTCCAGCTTGGT         |
| <i>Cas9 (Step 2)</i>                  | Fw                 | AGTTCATCAAGCCCATCTG          |
|                                       | Rv                 | GAAGTTTCTGTTGGCGAAGC         |
| <i>Amp (Step 3)</i>                   | Fw                 | TTGCCGGAAGCTAGAGTAA          |
|                                       | Rv                 | TTTGCCCTCCTGTTTTTGCT         |
| <i>Myod1 3' (Step 4)</i>              | Fw                 | ATCCCCGATTACAAGAAGCTGTCCTTC  |
|                                       | Rv                 | TTTTCTGIGTTACCTTCCGGGCCTTGA  |
| <i>Myod1 5' (Step 5)</i>              | Fw                 | AAGTGAATGAGGCCTTCGAGACGCTCAA |
|                                       | Rv                 | GCTCGTACTGTTCCACGATGGTGTAGTC |
| <b>Routine genotyping</b>             | <b>Orientation</b> | <b>Sequence (5' to 3')</b>   |
| <i>tdTomato (Step 1)</i>              | Rv                 | GAGGTGATGTCCAGCTTGGT         |
| <i>Myod1</i>                          | Fw                 | ATGGGCAGGAGACTGAGAA          |
|                                       | Rv                 | CGAAAGGACAGTTGGGAAGA         |
| <b>RT-qPCR</b>                        | <b>Orientation</b> | <b>Sequence (5' to 3')</b>   |
| <i>Pax7</i>                           | Fw                 | CTCAGTGAGTTCGATTAGCCG        |
|                                       | Rv                 | AGACGGTTCCTTTGTCGC           |
| <i>Myod1</i>                          | Fw                 | CCCCGCGGCAGAAATGGCTACG       |
|                                       | Rv                 | GGTCTGGGTTCCCTGTTCTGTGT      |
| <i>Myogenin</i>                       | Fw                 | CAACCAGGAGGAGCGGATCTCCG      |
|                                       | Rv                 | AGGCGCTGTGGGAGTTGCATCACT     |
| <i>tdTomato</i>                       | Fw                 | ACCGCCAAGCTGAAGGTGAC         |
|                                       | Rv                 | TTGAAGCCCTCGGGGAAGGA         |
| <i>Coll1a1</i>                        | Fw                 | CCTCAGGGTATTGCTGGACAAC       |
|                                       | Rv                 | CAGAAGGACCTTGTTTGCCAGG       |
| <i>Pdgfra</i>                         | Fw                 | GCAGTTGCCTTACGACTCCAGA       |
|                                       | Rv                 | GGTTTGAGCATCTTCACAGCCAC      |
| <i>TATA-box binding protein (TBP)</i> | Fw                 | CAGATGTGCGTCAGGCGTTC         |
|                                       | Rv                 | TAGTGATGCTGGGCACTGCG         |
| <b>Sequence analysis</b>              | <b>Orientation</b> | <b>Sequence (5' to 3')</b>   |
| <i>Myod1 3' (Step 4)</i>              | Fw1                | ATCCCCGATTACAAGAAGCTGTC      |
|                                       | Fw2                | AGAGGGAAGGGAAGAGCAGAA        |
|                                       | Fw3                | TCGCTCGCTCAGGTGTTGG          |

|                          |     |                        |
|--------------------------|-----|------------------------|
| <i>Myod1</i> 5' (Step 5) | Fw1 | AAGTGAATGAGGCCTTCGAGAC |
|                          | Fw2 | AGGGGTGATGACAAGGAG     |
|                          | Rv1 | GCTCGTACTGTTCCACGATGGT |
|                          | Rv2 | AAGCGCATGAACTCTTTG     |
